# Supplementary material for: Functionalized lignin biomaterials for enhancing optical properties and cellular interactions of dyes
Source: Royal Society of Chemistry journal article supplement (doi:10.1039/c7bm00518k), 2017-01-01
Supplement: c7bm00518k1.pdf [file c7bm00518k1.pdf]

*Supporting Information for:*

# Functionalized Lignin Biomaterials for Enhancing Optical Properties and Cellular Interactions of Dyes

*Anthony N. Cauley and James N. Wilson\**

Department of Chemistry, University of Miami, 1301 Memorial Drive, Coral Gables, FL  
33124, United States.

---

|                                                                |     |
|----------------------------------------------------------------|-----|
| <b>Figure S1:</b> $^1\text{H}$ -NMR of lignin                  | S2  |
| <b>Figure S2:</b> $^1\text{H}$ -NMR of L-Bu                    | S3  |
| <b>Figure S3:</b> $^1\text{H}$ -NMR of L-Dec                   | S4  |
| <b>Figure S4:</b> $^1\text{H}$ -NMR of L-Bn                    | S5  |
| <b>Figure S5:</b> $^1\text{H}$ -NMR of L-PA                    | S6  |
| <b>Figure S6:</b> $^1\text{H}$ -NMR of L-HA                    | S7  |
| <b>Figure S7:</b> $^1\text{H}$ -NMR of L-PTMA                  | S8  |
| <b>Figure S8:</b> DLS Histogram of lignin                      | S9  |
| <b>Figure S9:</b> DLS Histogram of L-Bu                        | S10 |
| <b>Figure S10:</b> DLS Histogram of L-Dec                      | S11 |
| <b>Figure S11:</b> DLS Histogram of L-Bn                       | S12 |
| <b>Figure S12:</b> DLS Histogram of L-PA                       | S13 |
| <b>Figure S13:</b> DLS Histogram of L-HA                       | S14 |
| <b>Figure S14:</b> DLS Histogram of L-PTMA                     | S15 |
| <b>Figure S15:</b> UV-vis analysis of L-Dec:DiI binding ratios | S16 |

---

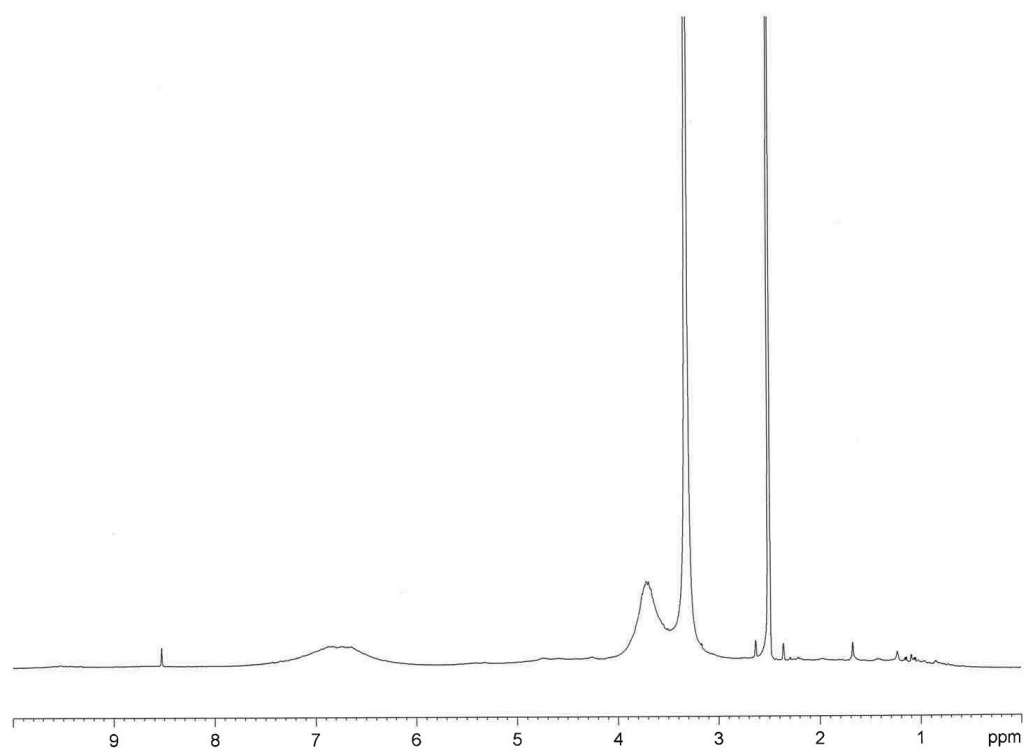

**Figure S1.**  $^1\text{H}$ -NMR of lignin

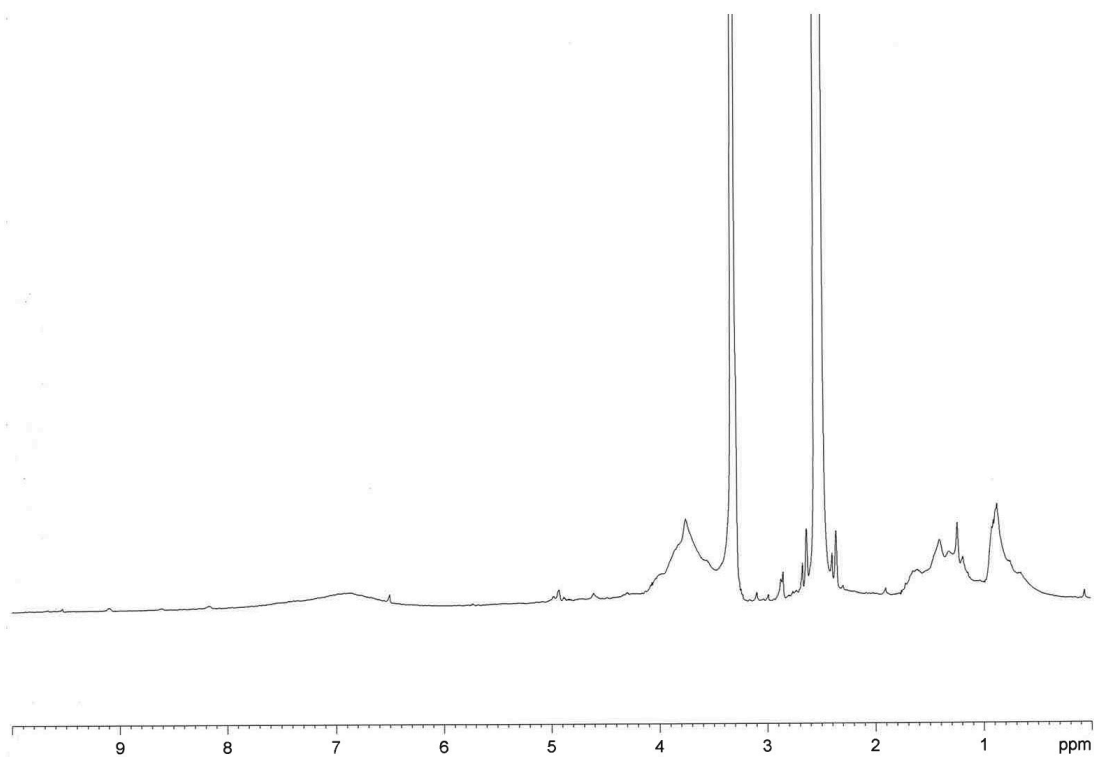

**Figure S2.**  $^1\text{H}$ -NMR of L-Bu.

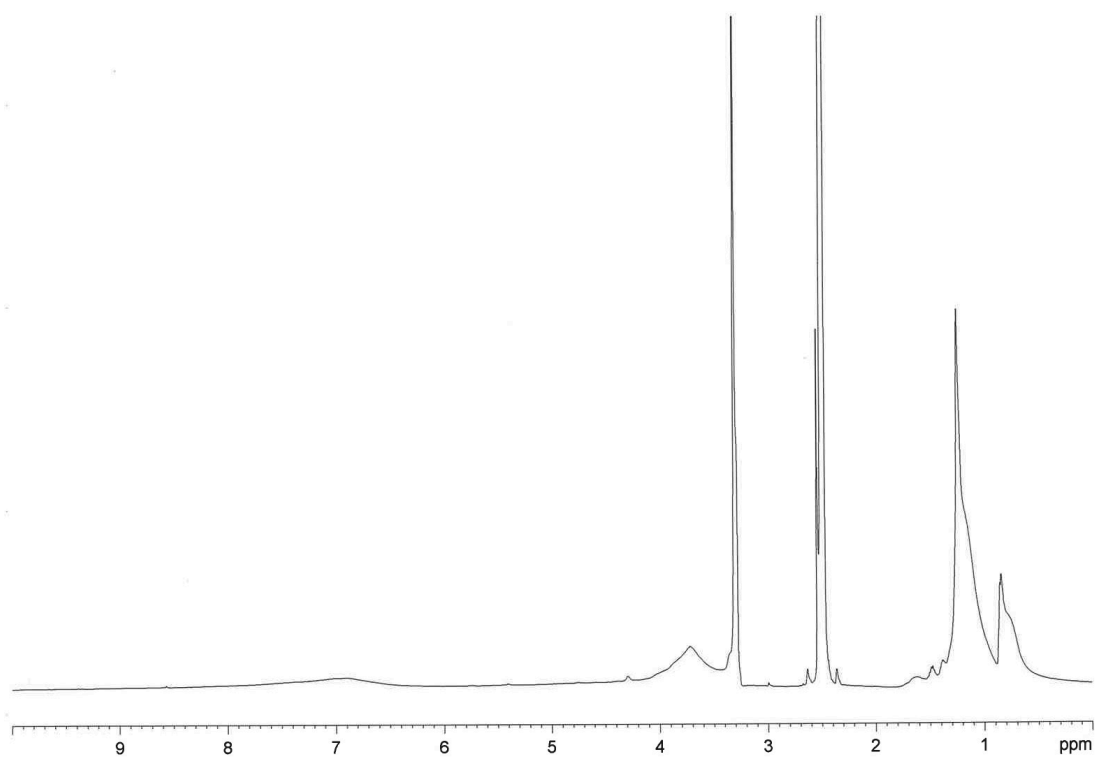

**Figure S3.**  $^1\text{H}$ -NMR of L-Dec.

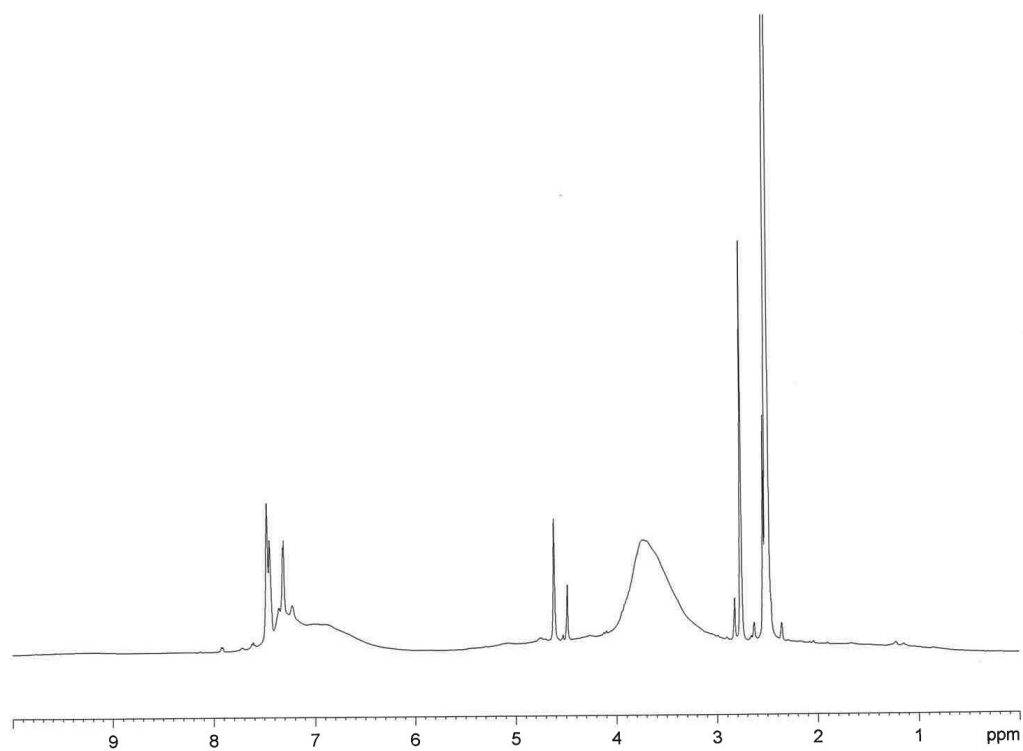

**Figure S4.**  $^1\text{H}$ -NMR of L-Bn.

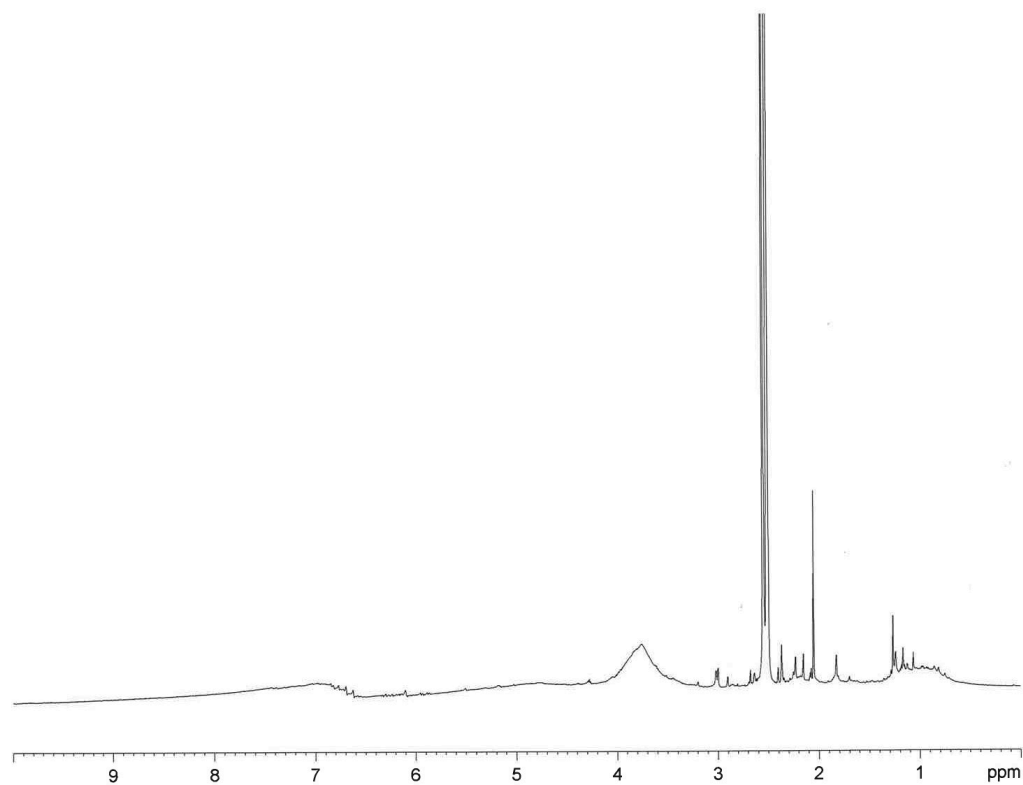

**Figure S5.**  $^1\text{H}$ -NMR of L-PA.

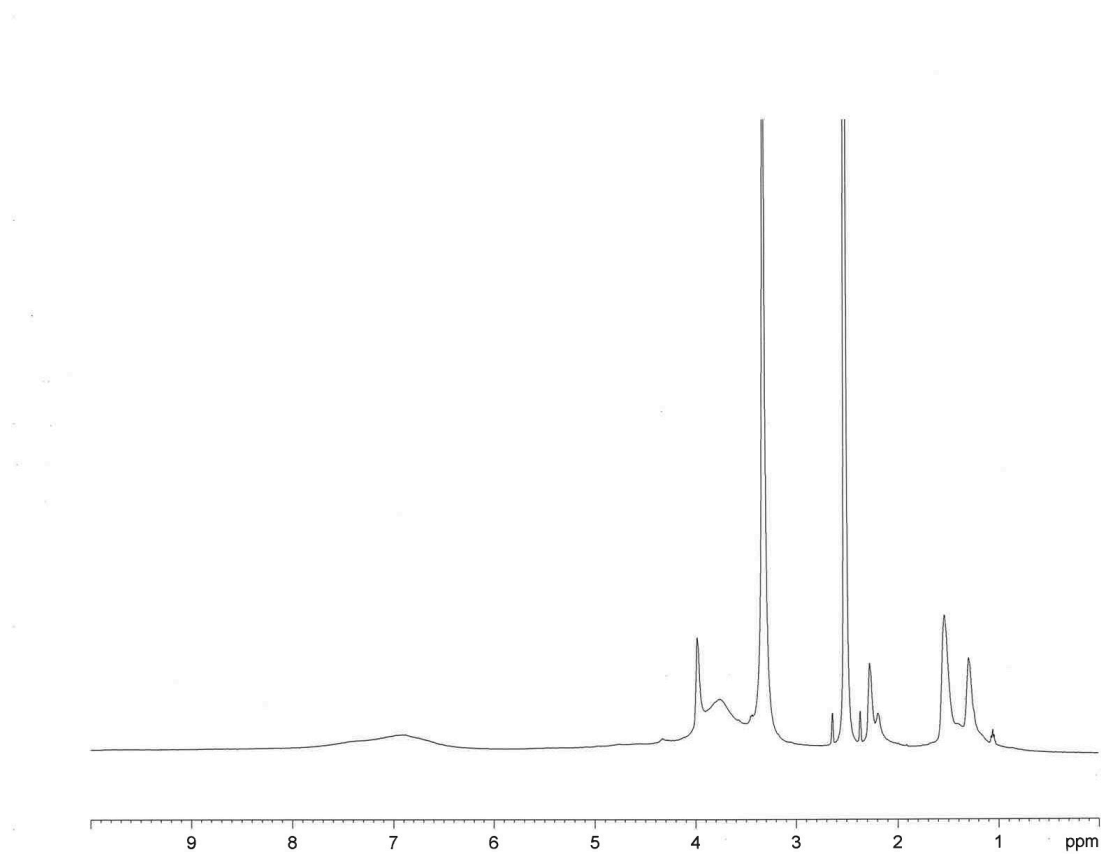

**Figure S6.**  $^1\text{H}$ -NMR of L-HA.

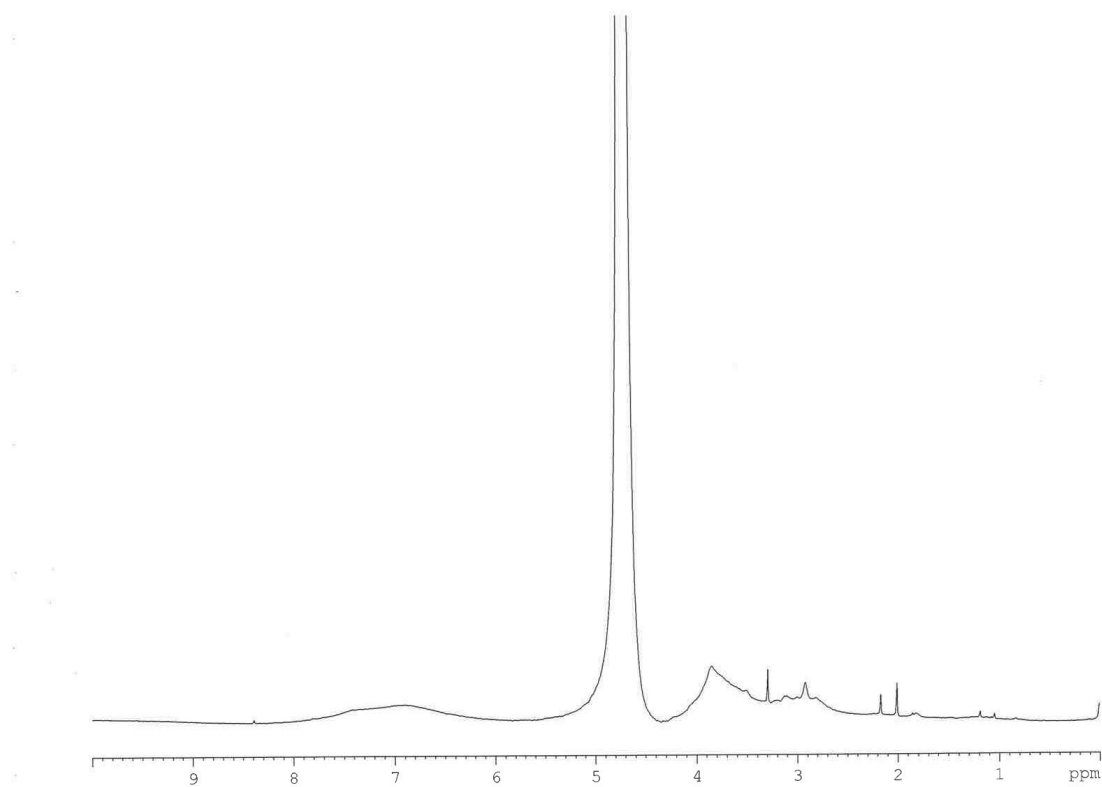

**Figure S7.**  $^1\text{H}$ -NMR of L-PTMA.



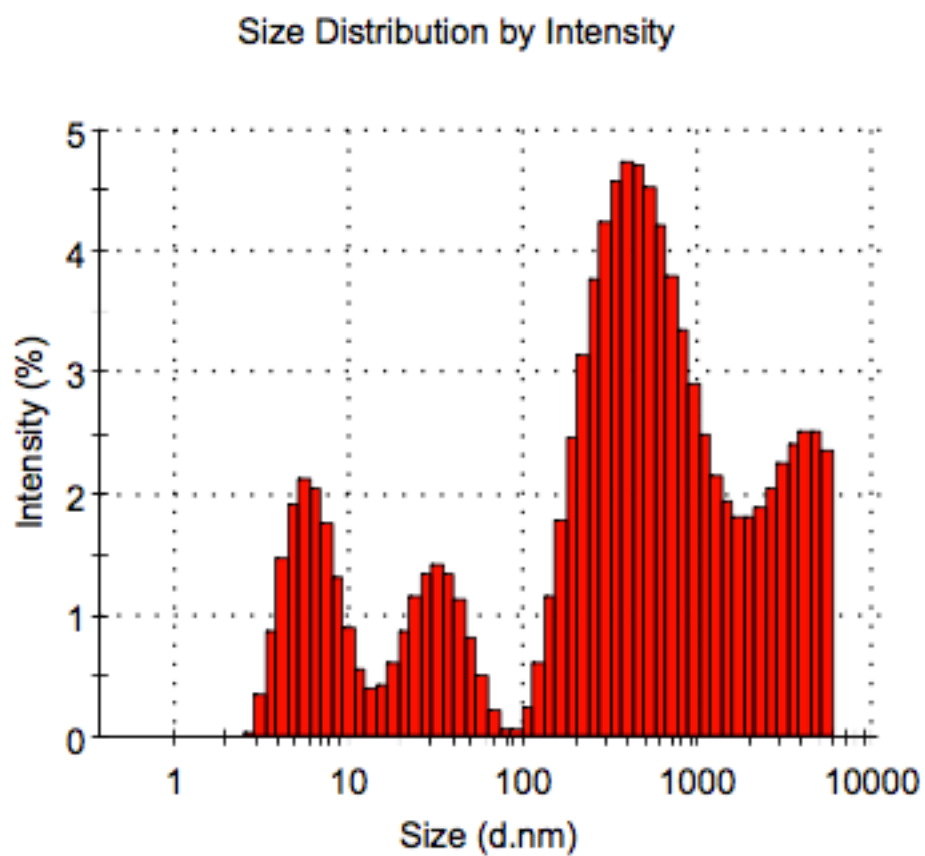

**Figure S8.** DLS Histogram of lignin.

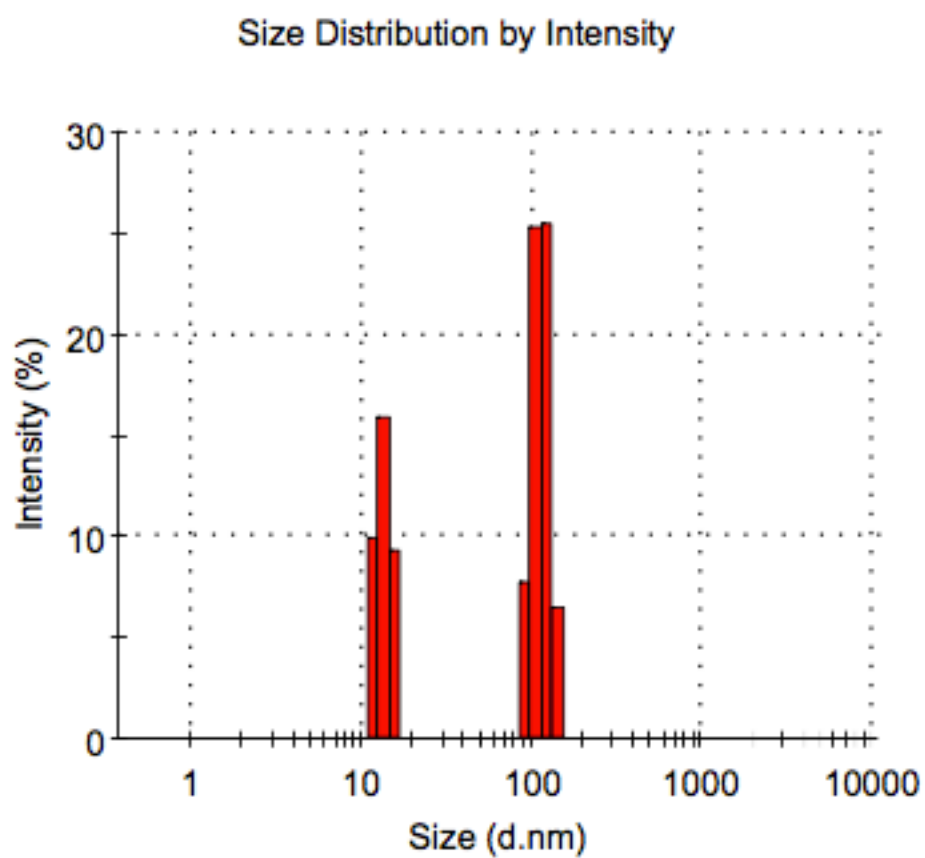

**Figure S9.** DLS Histogram of L-Bu.

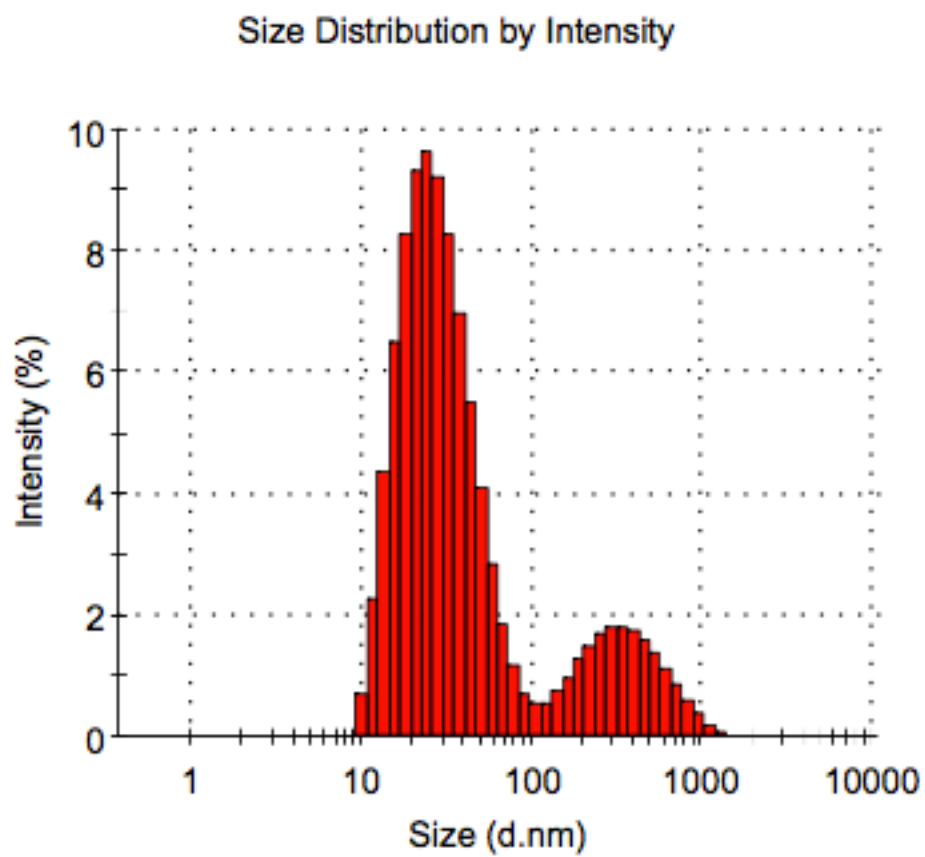

**Figure S10.** DLS Histogram of L-Dec.

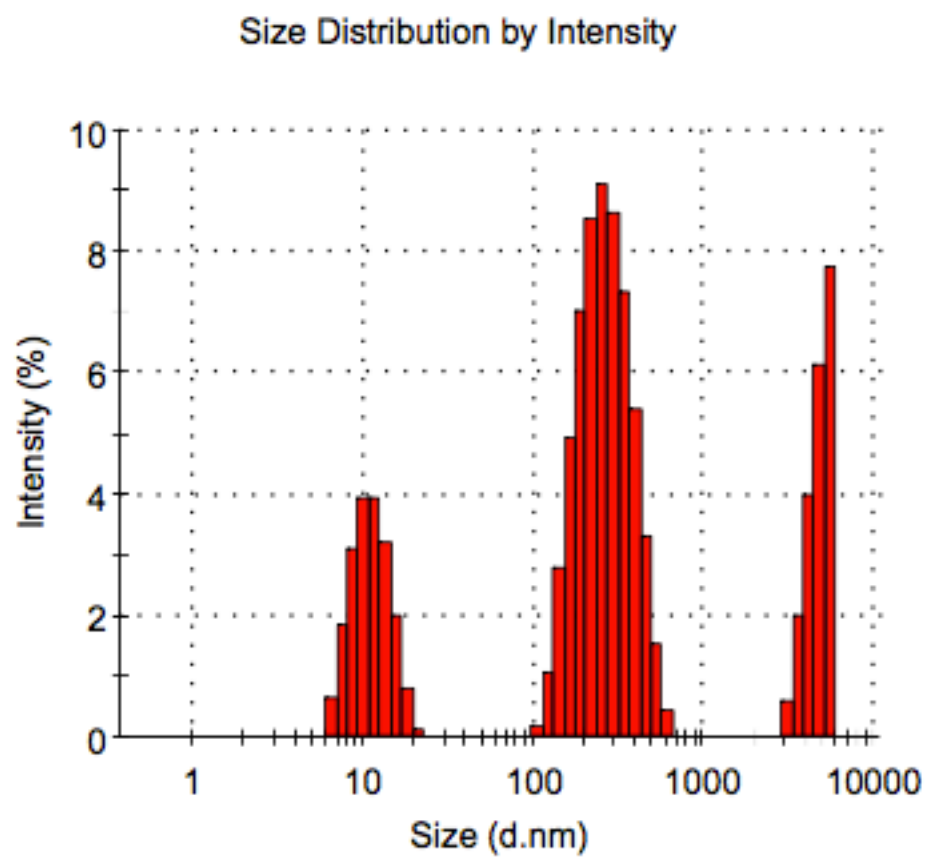

**Figure S11.** DLS Histogram of L-Bn.

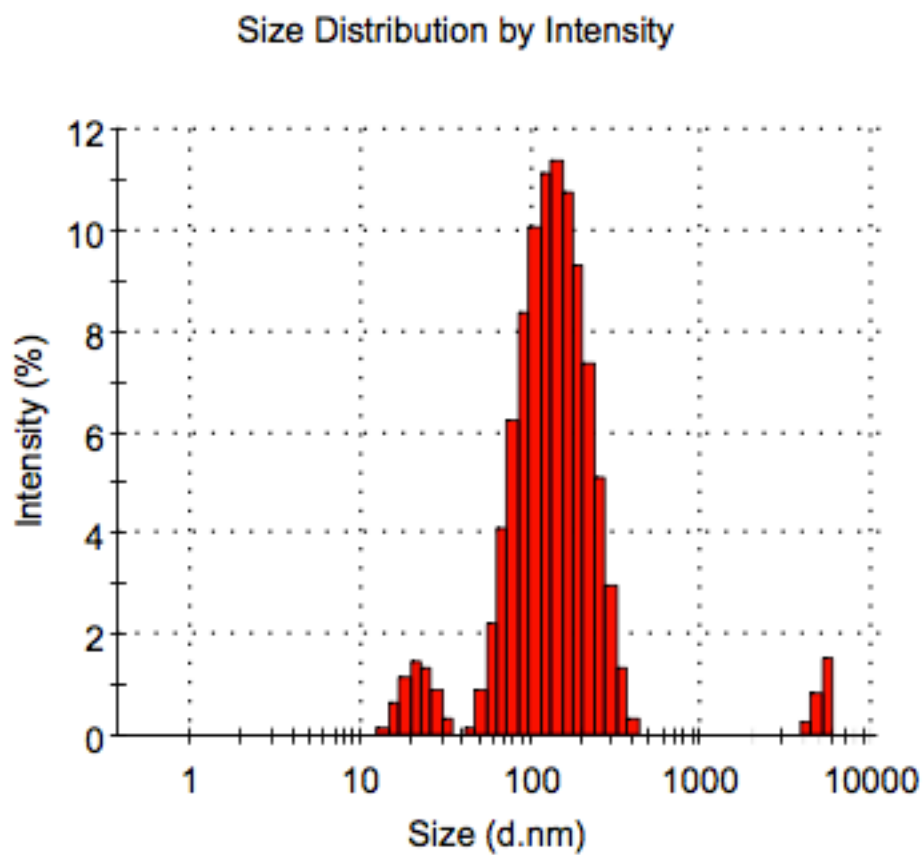

**Figure S12.** DLS Histogram of L-PA.

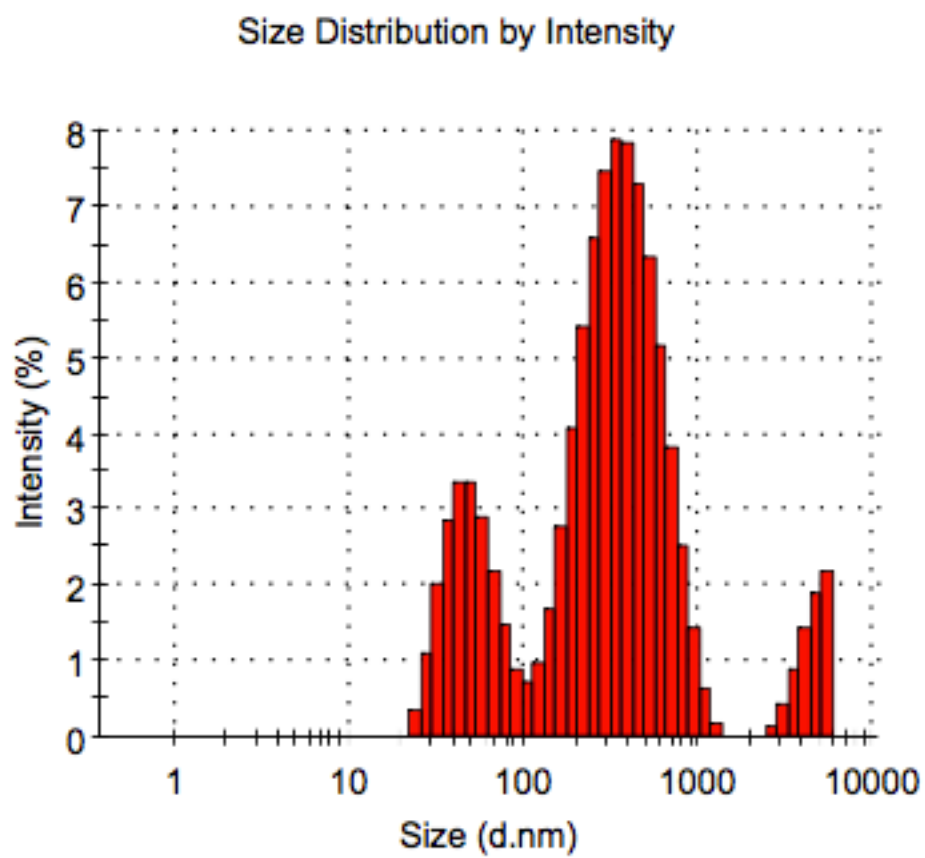

**Figure S13.** DLS Histogram of L-HA.

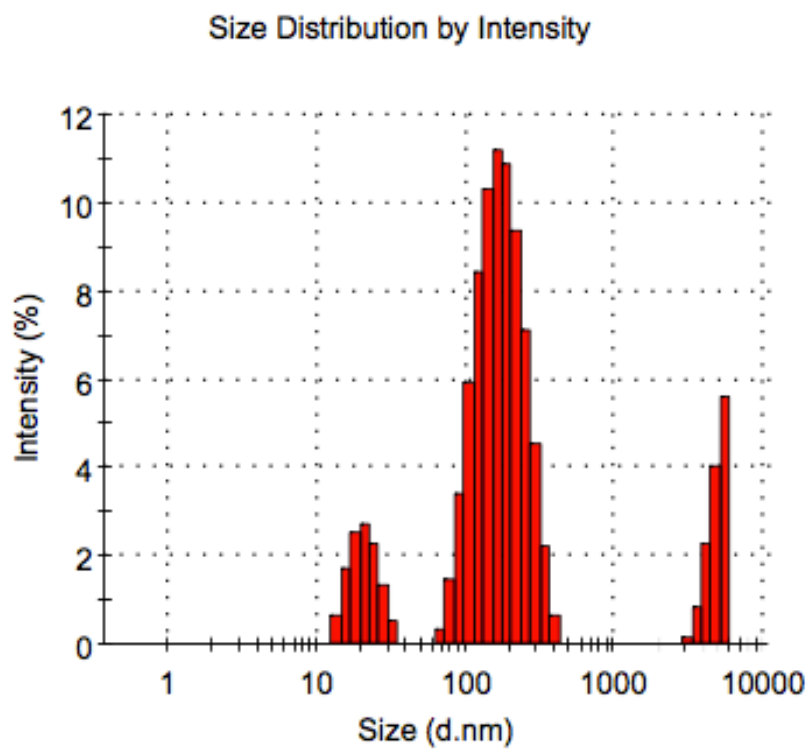

**Figure S14.** DLS Histogram of L-PTMA.

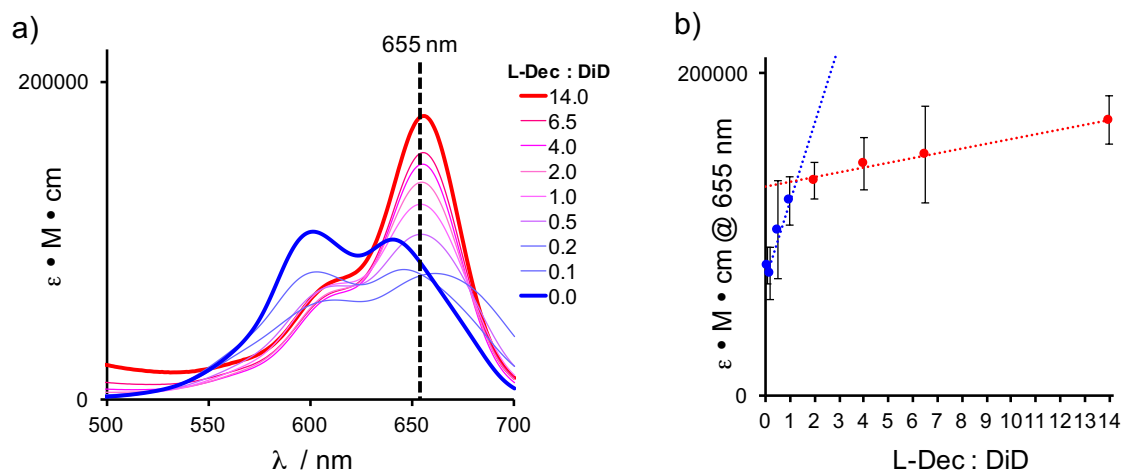

**Figure S15.** UV-vis analysis of L-Dec:DiD binding ratios. A) At low L-Dec (i.e. high DiD) concentrations, pronounced hypochromicity is observed as the dyes electronically couple. B) This is clearly seen in the analysis of the  $\lambda_{\text{max}}$  at 655 nm, as below a 1:1 ratio, i.e. lower L-Dec concentrations, there is a marked drop-off in  $\epsilon$  (blue data points). Optimal dye loading is therefore kept at one dye molecule per lignin macromolecule, although these may be assembled into larger structures containing more dyes as seen in SEM images.
